# Supplementary material
Source: publisher site journal article supplement (https://www.dovepress.com/get_supplementary_file.php?f=280957.docx)
Supplement: Supplementary file 1 [file get_supplementary_file.php]

**Supplementary Table 1. Minimum, median and maximum values of insertion torque and resonance frequency for HAnano®, SLActive® and TiUnite® groups according to device/transducer.**

| Surfaces |  | **Insertion torque** | | |  | **Osstell®/Smart Peg®** | | |  | **Penguin®/Multi Peg®** | | |  |
| --- | --- | --- | --- | --- | --- | --- | --- | --- | --- | --- | --- | --- | --- |
|  | Minimum  (N/cm) | Median  (N/cm) | Maximum  (N/cm) |  | Minimum  (ISQ) | Median  (ISQ) | Maximum  (ISQ) |  | Minimum  (ISQ) | Median  (ISQ) | Maximum  (ISQ) |  |
| **HAnano** |  | 60 | 70 | 80 |  | 69 | 75 | 76 |  | 76 | 82 | 82 | * |
| **SLActive** |  | 60 | 80 | 80 |  | 74 | 77 | 79 |  | 83 | 86 | 89 | * |
| **TiUnite** |  | 60 | 80 | 80 |  | 69 | 80 | 80 |  | 82 | 87 | 88 | * |

**Abbreviations**: SD (standard deviation); ISQ (implant stability coefficient); RFA (resonance frequency analysis).

(*) Significant difference vs. Osstell/Smart Peg.

**Supplementary Table 2. Mean, standard deviation, minimum and maximum values of bone area fraction occupancy (BAFO) and bone-implant contact (BIC) for HAnano®, SLActive® and TiUnite® groups after 21- and 28-days post-implantation.**

| Period |  |  |  | **BAFO (%)** | |  |  |  | Period |  |  | **BIC (%)** | | |  |  |
| --- | --- | --- | --- | --- | --- | --- | --- | --- | --- | --- | --- | --- | --- | --- | --- | --- |
| (Days) | Group | Mean (n=5) |  | | SD | Min | Max |  | (Days) | Group | Mean (n=5) | |  | SD | Min | Max |
| **14** | Nano HA | 47,96 |  | | 5,377 | 43,12 | 57,14 |  | **14** | Nano HA | 66,09 |  | | 13,12 | 51,43 | 77,99 |
|  | SLActive | 44,49 |  | | 9,024 | 30,91 | 56,04 |  |  | SLActive | 66,54 |  | | 11,04 | 49,3 | 76,04 |
|  | TiUnite | 41,5 |  | | 2,694 | 38,18 | 45,44 |  |  | TiUnite | 61,34 |  | | 7,278 | 53,26 | 69,2 |
| **28** | Nano HA | 65,53 | * | | 6,227 | 59,69 | 72,75 |  | **28** | Nano HA | 82,27 | * | | 3,381 | 76,81 | 85,2 |
|  | SLActive | 62,56 | * | | 7,898 | 51,3 | 73,56 |  |  | SLActive | 82,83 | * | | 6,846 | 77,7 | 94,08 |
|  | TiUnite | 55,68 | * | | 5,827 | 48,78 | 63,6 |  |  | TiUnite | 80,46 | * | | 10,04 | 70,59 | 93,11 |

**Abbreviations**: BAFO (bone area fraction occupancy); BIC (bone-implant contact); SD (standard deviation); Min (minimum); Max (maximum).

(*****) Significant difference *vs. the* same group at previous experimental period.


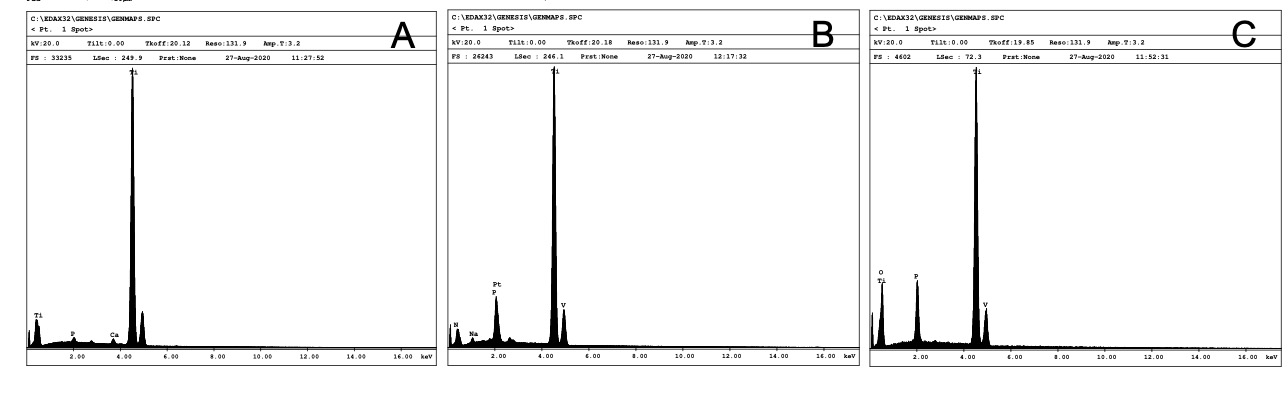


Supplementary Figure 1. Energy-dispersive spectroscopy revealed the presence of calcium only in the HAnano group (A) and that of sodium only in the SLActive® group (B). Titanium, vanadium, and phosphorus peaks were observed in all groups. A. HAnano; B. SLActive; C. TiUnite.
